# Supplementary material
Source: ML conference proceedings conference paper supplement (https://proceedings.mlr.press/v119/chen20p.html)
Supplement: Supplementary file [file chen20p-supp.pdf]

---

# VFlow: More Expressive Generative Flows with Variational Data Augmentation Supplementary Material

---

## A. Verification of Assumption A1 and A2

A1 For all  $p(\mathbf{x}; \boldsymbol{\theta}_{D_X}) \in \mathcal{P}_{D_X}$  and  $D_Z > 0$ , there exists  $p(\mathbf{x}, \mathbf{z}; \boldsymbol{\theta}_{D_X+D_Z}) \in \mathcal{P}_{D_X+D_Z}$ , such that for all  $\mathbf{x}$  and  $\mathbf{z}$ ,

$$p(\mathbf{x}, \mathbf{z}; \boldsymbol{\theta}_{D_X+D_Z}) = p(\mathbf{x}; \boldsymbol{\theta}_{D_X})p_\epsilon(\mathbf{z}).$$

A2 For all  $D_Z > 0$ , there exists  $q(\mathbf{z}|\mathbf{x}; \phi) \in \mathcal{Q}_{D_Z}$ , such that for all  $\mathbf{x}$  and  $\mathbf{z}$ ,

$$q(\mathbf{z}|\mathbf{x}; \phi) = p_\epsilon(\mathbf{z}).$$

Let  $\mathbf{x}, \mathbf{z}$  be row vectors, and  $[\mathbf{x} \ \mathbf{z}]$  be the horizontal concatenation of  $\mathbf{x}$  and  $\mathbf{z}$ . We first show that the following conditions are sufficient for Assumption A1 and A2.

B1 For all  $\boldsymbol{\theta}_{D_X} \in \Theta_{D_X}$  and  $D_Z > 0$ , there exists  $\boldsymbol{\theta}_{D_X+D_Z} \in \Theta_{D_X+D_Z}$ , such that for all  $l, \mathbf{x}$  and  $\mathbf{z}$ ,

$$\mathbf{f}_l([\mathbf{x} \ \mathbf{z}]; \boldsymbol{\theta}_{D_X+D_Z}) = [\mathbf{f}_l(\mathbf{x}; \boldsymbol{\theta}_{D_X}) \ \mathbf{z}].$$

B2 For all  $D_Z > 0$ , there exists  $\phi \in \Phi_{D_Z}$ , such that for all  $l, \mathbf{x}$  and  $\mathbf{z}$ ,

$$\mathbf{g}_l(\epsilon_q; \mathbf{x}, \phi) = \epsilon_q.$$

*Proof.* Under condition B1,

$$\begin{aligned} & \mathbf{f}([\mathbf{x} \ \mathbf{z}]) \\ &= \mathbf{f}_1(\dots(\mathbf{f}_L([\mathbf{x} \ \mathbf{z}]))) \\ &= \mathbf{f}_1(\dots(\mathbf{f}_{L-1}([\mathbf{f}_L(\mathbf{x}) \ \mathbf{z}]))) \\ &= \mathbf{f}_1(\dots(\mathbf{f}_{L-2}([\mathbf{f}_{L-1}(\mathbf{f}_L(\mathbf{x})) \ \mathbf{z}]))) = \dots \\ &= [\mathbf{f}_1(\dots(\mathbf{f}_L(\mathbf{x})) \ \mathbf{z})]. \end{aligned}$$

Then,

$$\begin{aligned} p(\mathbf{x}, \mathbf{z}; \boldsymbol{\theta}_{D_X+D_Z}) &= p_\epsilon(\mathbf{f}([\mathbf{x} \ \mathbf{z}]; \boldsymbol{\theta}_{D_X+D_Z})) \left| \frac{\partial \mathbf{f}([\mathbf{x} \ \mathbf{z}]; \boldsymbol{\theta}_{D_X+D_Z})}{\partial [\mathbf{x} \ \mathbf{z}]} \right| \\ &= p_\epsilon([\mathbf{f}(\mathbf{x}; \boldsymbol{\theta}_{D_X}) \ \mathbf{z}]) \left| \frac{\partial [\mathbf{f}(\mathbf{x}; \boldsymbol{\theta}_{D_X}) \ \mathbf{z}]}{\partial [\mathbf{x} \ \mathbf{z}]} \right| \\ &= p_\epsilon(\mathbf{f}(\mathbf{x}; \boldsymbol{\theta}_{D_X})) p_\epsilon(\mathbf{z}) \left| \begin{bmatrix} \frac{\partial \mathbf{f}(\mathbf{x}; \boldsymbol{\theta}_{D_X})}{\partial \mathbf{x}} & \mathbf{0} \\ \mathbf{0} & \mathbf{I} \end{bmatrix} \right| \\ &= p_\epsilon(\mathbf{f}(\mathbf{x}; \boldsymbol{\theta}_{D_X})) \left| \frac{\partial \mathbf{f}(\mathbf{x}; \boldsymbol{\theta}_{D_X})}{\partial \mathbf{x}} \right| p_\epsilon(\mathbf{z}) \\ &= p(\mathbf{x}; \boldsymbol{\theta}_{D_X}) p_\epsilon(\mathbf{z}). \end{aligned}$$

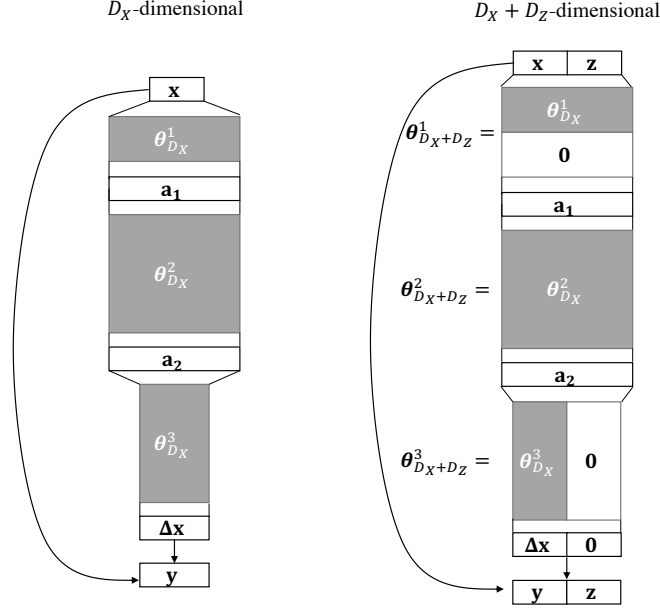

Figure 7. Constructing  $f_l([\mathbf{x} \ \mathbf{z}]; \boldsymbol{\theta}_{D_X+D_Z})$  based on  $f_l(\mathbf{x}; \boldsymbol{\theta}_{D_X})$ .

Similarly, under condition B2,

$$\mathbf{g}(\epsilon_q; \mathbf{x}, \boldsymbol{\phi}) = \mathbf{g}_1(\dots(\mathbf{g}_L(\epsilon_q))) = \epsilon_q.$$

So

$$q(\mathbf{z}; \mathbf{x}, \boldsymbol{\phi}) = q(\mathbf{g}(\epsilon_q; \mathbf{x}, \boldsymbol{\phi}) | \mathbf{x}; \boldsymbol{\phi}) = p_\epsilon(\epsilon_q) / \left| \frac{\partial \mathbf{z}}{\partial \epsilon_q} \right| = p_\epsilon(\epsilon_q) / |\mathbf{I}| = p_\epsilon(\epsilon_q).$$

□

Therefore, we only need to verify condition B1 and B2 separately for each transformation step. For Glow (Kingma & Dhariwal, 2018) and Residual Flow (Chen et al., 2019), the transformations to verify includes affine coupling layer (Dinh et al., 2017), invertible  $1 \times 1$  convolution (Kingma & Dhariwal, 2018), and invertible residual blocks (Behrmann et al., 2019). In this section we only verify condition B1 and B2 for fully-connected transformations, but they readily generalize to convolutional transformations.

### A.1. Invertible Residual Blocks

An invertible residual block (Behrmann et al., 2019)  $f_l(\mathbf{x}; \boldsymbol{\theta}_{D_X})$  for  $D_X$ -dimensional input  $\mathbf{x}$  is defined as

$$\mathbf{a}_1 = \mathbf{x} \boldsymbol{\theta}_{D_X}^{(1)}, \quad \mathbf{a}_2 = \mathbf{n}(\mathbf{a}_1; \boldsymbol{\theta}_{D_X}^{(2)}), \quad \Delta_{\mathbf{x}} = \mathbf{a}_2 \boldsymbol{\theta}_{D_X}^{(3)}, \quad f_l(\mathbf{x}; \boldsymbol{\theta}_{D_X}) = \mathbf{y} = \mathbf{x} + \Delta_{\mathbf{x}},$$

where we explicitly write the first and last linear layer, and leave all the internal hidden layers as  $\mathbf{n}(\mathbf{a}_1; \boldsymbol{\theta}_{D_X}^{(2)})$ . We construct a  $D_X + D_Z$ -dimensional invertible residual block  $f_l([\mathbf{x} \ \mathbf{z}]; \boldsymbol{\theta}_{D_X+D_Z})$  as

$$\mathbf{a}_1 = [\mathbf{x} \ \mathbf{z}] \boldsymbol{\theta}_{D_X+D_Z}^{(1)}, \quad \mathbf{a}_2 = \mathbf{n}(\mathbf{a}_1; \boldsymbol{\theta}_{D_X+D_Z}^{(2)}), \quad [\Delta_{\mathbf{x}} \ \mathbf{0}] = \mathbf{a}_2 \boldsymbol{\theta}_{D_X+D_Z}^{(3)},$$

$$f_l([\mathbf{x} \ \mathbf{z}]; \boldsymbol{\theta}_{D_X+D_Z}) = [\mathbf{x} + \Delta_{\mathbf{x}} \ \mathbf{z} + \mathbf{0}] = [f_l(\mathbf{x}; \boldsymbol{\theta}_{D_X}) \ \mathbf{z}],$$

satisfying condition B1, where

$$\boldsymbol{\theta}_{D_X+D_Z}^{(1)} = \begin{bmatrix} \boldsymbol{\theta}_{D_X}^{(1)} \\ \mathbf{0} \end{bmatrix}, \quad \boldsymbol{\theta}_{D_X+D_Z}^{(2)} = \boldsymbol{\theta}_{D_X}^{(2)}, \quad \boldsymbol{\theta}_{D_X+D_Z}^{(3)} = \begin{bmatrix} \boldsymbol{\theta}_{D_X}^{(3)} & \mathbf{0} \end{bmatrix}.$$

This construction is demonstrated by Fig. 7. Intuitively, due to the residual structure, we only need to output  $\mathbf{0}$  for all the  $\mathbf{z}$  dimensions. Similarly, condition B2 can be satisfied by taking  $\boldsymbol{\theta}_{D_Z}^{(3)} = \mathbf{0}$ , so that all the residuals are zero and the network outputs identity.

## A.2. Affine Coupling Layer

An affine coupling layer (Dinh et al., 2017)  $f_l(\mathbf{x}; \boldsymbol{\theta}_{D_X})$  for  $D_X$ -dimensional input  $\mathbf{x}$  is defined as

$$\mathbf{x}_1, \mathbf{x}_2 = \text{split}(\mathbf{x}), \quad \mathbf{y}_1 = \mathbf{x}_1, \quad \mathbf{y}_2 = \boldsymbol{\mu}(\mathbf{x}_1; \boldsymbol{\theta}_{D_X}) + \exp(\mathbf{s}(\mathbf{x}_1; \boldsymbol{\theta}_{D_X})) \circ \mathbf{x}_2, \quad \mathbf{f}_l(\mathbf{x}; \boldsymbol{\theta}_{D_X}) = \text{concat}(\mathbf{y}_1, \mathbf{y}_2).$$

The case of affine coupling layer is almost identical to the invertible residual block, because both transformations have residual structures. This can be seen by noticing when  $\boldsymbol{\mu}(\mathbf{x}_1; \boldsymbol{\theta}_{D_X}) = \mathbf{s}(\mathbf{x}_1; \boldsymbol{\theta}_{D_X}) = \mathbf{0}$ ,  $\mathbf{f}_l(\mathbf{x}; \boldsymbol{\theta}_{D_X}) = \mathbf{x}$ . We explicitly write out the first and last linear layers of  $\boldsymbol{\mu}(\cdot)$  and  $\mathbf{s}(\cdot)$ :

$$\begin{aligned} \mathbf{x}_1, \mathbf{x}_2 &= \text{split}(\mathbf{x}), \quad \mathbf{y}_1 = \mathbf{x}_1, \\ \mathbf{a}_1 &= \mathbf{x}_1 \boldsymbol{\theta}_{D_X}^{(a1)}, \quad \mathbf{a}_2 = \boldsymbol{\mu}'(\mathbf{a}_1; \boldsymbol{\theta}_{D_X}^{(a2)}), \quad \mathbf{a}_3 = \mathbf{a}_2 \boldsymbol{\theta}_{D_X}^{(a3)}, \\ \mathbf{b}_1 &= \mathbf{x}_1 \boldsymbol{\theta}_{D_X}^{(b1)}, \quad \mathbf{b}_2 = \mathbf{s}'(\mathbf{b}_1; \boldsymbol{\theta}_{D_X}^{(b2)}), \quad \mathbf{b}_3 = \mathbf{b}_2 \boldsymbol{\theta}_{D_X}^{(b3)}, \\ \mathbf{y}_2 &= \mathbf{a}_3 + \mathbf{b}_3 \circ \mathbf{x}_2, \quad \mathbf{f}_l(\mathbf{x}; \boldsymbol{\theta}_{D_X}) = \text{concat}(\mathbf{y}_1, \mathbf{y}_2). \end{aligned}$$

A  $D_X + D_Z$ -dimensional affine coupling layer has the form

$$\begin{aligned} [\mathbf{x}_1 \quad \mathbf{z}_1], [\mathbf{x}_2 \quad \mathbf{z}_2] &= \text{split}([\mathbf{x} \quad \mathbf{z}]), \quad \mathbf{y}_1 = \mathbf{x}_1, \\ \mathbf{a}_1 &= [\mathbf{x}_1 \quad \mathbf{z}_1] \boldsymbol{\theta}_{D_X+D_Z}^{(a1)}, \quad \mathbf{a}_2 = \boldsymbol{\mu}'(\mathbf{a}_1; \boldsymbol{\theta}_{D_X+D_Z}^{(a2)}), \quad [\mathbf{a}_3 \quad \mathbf{u}_3] = \mathbf{a}_2 \boldsymbol{\theta}_{D_X+D_Z}^{(a3)}, \\ \mathbf{b}_1 &= [\mathbf{x}_1 \quad \mathbf{z}_1] \boldsymbol{\theta}_{D_X+D_Z}^{(b1)}, \quad \mathbf{b}_2 = \mathbf{s}'(\mathbf{b}_1; \boldsymbol{\theta}_{D_X+D_Z}^{(b2)}), \quad [\mathbf{b}_3 \quad \mathbf{w}_3] = \mathbf{b}_2 \boldsymbol{\theta}_{D_X+D_Z}^{(b3)}, \\ \mathbf{y}_2 &= [\mathbf{a}_3 + \mathbf{b}_3 \circ \mathbf{x}_2 \quad \mathbf{u}_3 + \mathbf{w}_3 \circ \mathbf{z}_2], \quad \mathbf{f}_l([\mathbf{x} \quad \mathbf{z}]; \boldsymbol{\theta}_{D_X+D_Z}) = \text{concat}([\mathbf{y}_1 \quad \mathbf{z}_1], \mathbf{y}_2), \end{aligned}$$

We want the networks  $\boldsymbol{\mu}(\cdot; \boldsymbol{\theta}_{D_X+D_Z})$  and  $\mathbf{s}(\cdot; \boldsymbol{\theta}_{D_X+D_Z})$  to ignore the  $\mathbf{z}_1$  part from the input, and output zero for  $\mathbf{u}_3, \mathbf{w}_3$ , so that

$$\begin{aligned} [\mathbf{a}_3 \quad \mathbf{u}_3] &= [\boldsymbol{\mu}(\mathbf{x}_1; \boldsymbol{\theta}_{D_X}) \quad \mathbf{0}], \quad [\mathbf{b}_3 \quad \mathbf{w}_3] = [\mathbf{s}(\mathbf{x}_1; \boldsymbol{\theta}_{D_X}) \quad \mathbf{0}] \\ \mathbf{y}_2 &= [\boldsymbol{\mu}(\mathbf{x}_1; \boldsymbol{\theta}_{D_X}) + \exp(\mathbf{s}(\mathbf{x}_1; \boldsymbol{\theta}_{D_X})) \circ \mathbf{x}_2 \quad \mathbf{z}_2], \quad \mathbf{f}_l([\mathbf{x} \quad \mathbf{z}]; \boldsymbol{\theta}_{D_X+D_Z}) = [\mathbf{f}_l(\mathbf{x}; \boldsymbol{\theta}_{D_X}) \quad \mathbf{z}], \end{aligned}$$

so condition B1 is satisfied. We can easily achieve this by setting

$$\begin{aligned} \boldsymbol{\theta}_{D_X+D_Z}^{(a1)} &= \begin{bmatrix} \boldsymbol{\theta}_{D_X}^{(a1)} \\ \mathbf{0} \end{bmatrix}, \quad \boldsymbol{\theta}_{D_X+D_Z}^{(a2)} = \boldsymbol{\theta}_{D_X}^{(a2)}, \quad \boldsymbol{\theta}_{D_X+D_Z}^{(a3)} = \begin{bmatrix} \boldsymbol{\theta}_{D_X}^{(a3)} & \mathbf{0} \end{bmatrix} \\ \boldsymbol{\theta}_{D_X+D_Z}^{(b1)} &= \begin{bmatrix} \boldsymbol{\theta}_{D_X}^{(b1)} \\ \mathbf{0} \end{bmatrix}, \quad \boldsymbol{\theta}_{D_X+D_Z}^{(b2)} = \boldsymbol{\theta}_{D_X}^{(b2)}, \quad \boldsymbol{\theta}_{D_X+D_Z}^{(b3)} = \begin{bmatrix} \boldsymbol{\theta}_{D_X}^{(b3)} & \mathbf{0} \end{bmatrix}. \end{aligned}$$

Similarly, condition B2 can be satisfied by setting  $\boldsymbol{\theta}_{D_Z}^{(a3)} = \boldsymbol{\theta}_{D_Z}^{(b3)} = \mathbf{0}$ .

## A.3. Invertible $1 \times 1$ Convolution

For fully-connected cases, invertible  $1 \times 1$  convolution (Kingma & Dhariwal, 2018) degenerates to a regular matrix multiplication

$$\mathbf{f}_l(\mathbf{x}; \boldsymbol{\theta}_{D_X}) = \mathbf{x} \boldsymbol{\theta}_{D_X},$$

where  $\boldsymbol{\theta}_{D_X}$  is a non-singular matrix. We construct  $\mathbf{f}_l(\mathbf{x}; \boldsymbol{\theta}_{D_X+D_Z})$  such that

$$\boldsymbol{\theta}_{D_X+D_Z} = \begin{bmatrix} \boldsymbol{\theta}_{D_X} & \mathbf{0} \\ \mathbf{0} & \mathbf{I} \end{bmatrix}.$$

Clearly,  $\boldsymbol{\theta}_{D_X+D_Z}$  is also non-singular, and  $\mathbf{f}_l([\mathbf{x} \quad \mathbf{z}]; \boldsymbol{\theta}_{D_X+D_Z}) = [\mathbf{f}_l(\mathbf{x}; \boldsymbol{\theta}_{D_X}) \quad \mathbf{z}]$ . On the other hand, condition B2 can be satisfied by setting  $\boldsymbol{\theta}_{D_Z} = \mathbf{I}$ .

Table 4. Model architecture for improving existing models experiment and parameter efficiency experiment.

| Model                                                                                                    | 3-channel Flow++                                                                       | 6-channel VFlow                                                                        | 6-channel VFlow                                                                        | 6-channel VFlow                                                                        |
|----------------------------------------------------------------------------------------------------------|----------------------------------------------------------------------------------------|----------------------------------------------------------------------------------------|----------------------------------------------------------------------------------------|----------------------------------------------------------------------------------------|
| Parameters                                                                                               | 31.4M                                                                                  | 37.8M                                                                                  | 16.5M                                                                                  | 11.9M                                                                                  |
| bpd                                                                                                      | 3.08                                                                                   | 2.98                                                                                   | 3.03                                                                                   | 3.08                                                                                   |
| Architecture for $p(\mathbf{x}, \mathbf{z})$ : direction $(\mathbf{x}, \mathbf{z}) \rightarrow \epsilon$ |                                                                                        |                                                                                        |                                                                                        |                                                                                        |
| $32 \times 32$                                                                                           | $f_{\text{checker}}(10, 96, 32) \times 4$                                              | $f_{\text{checker}}(10, 96, 32) \times 2$<br>$f_{\text{channel}}(10, 96, 32) \times 2$ | $f_{\text{checker}}(10, 64, 16) \times 2$<br>$f_{\text{channel}}(10, 64, 16) \times 2$ | $f_{\text{checker}}(10, 56, 10) \times 2$<br>$f_{\text{channel}}(10, 56, 10) \times 2$ |
|                                                                                                          | SpaceToDepth                                                                           | SpaceToDepth                                                                           | SpaceToDepth                                                                           | SpaceToDepth                                                                           |
| $16 \times 16$                                                                                           | $f_{\text{channel}}(10, 96, 32) \times 2$<br>$f_{\text{checker}}(10, 96, 32) \times 3$ | $f_{\text{checker}}(10, 96, 32) \times 2$<br>$f_{\text{channel}}(10, 96, 32) \times 3$ | $f_{\text{checker}}(10, 64, 16) \times 2$<br>$f_{\text{channel}}(10, 64, 16) \times 3$ | $f_{\text{checker}}(10, 56, 10) \times 2$<br>$f_{\text{channel}}(10, 56, 10) \times 3$ |
| Architecture for $q(\mathbf{z} \mathbf{x})$ : direction $\epsilon_q \rightarrow \mathbf{z}$              |                                                                                        |                                                                                        |                                                                                        |                                                                                        |
| $32 \times 32$                                                                                           | N/A                                                                                    | $g_{\text{checker}}(3, 96, 32) \times 4$<br>Sigmoid                                    | $g_{\text{checker}}(3, 64, 16) \times 4$<br>Sigmoid                                    | $g_{\text{checker}}(3, 56, 10) \times 4$<br>Sigmoid                                    |
| Architecture for $r(\mathbf{u} \mathbf{x})$ : direction $\epsilon_r \rightarrow \mathbf{u}$              |                                                                                        |                                                                                        |                                                                                        |                                                                                        |
| $32 \times 32$                                                                                           | $g_{\text{checker}}(2, 96, 32) \times 4$<br>Sigmoid                                    | $g_{\text{checker}}(2, 96, 32) \times 4$<br>Sigmoid                                    | $g_{\text{checker}}(2, 64, 16) \times 4$<br>Sigmoid                                    | $f_{\text{checker}}(2, 56, 10) \times 4$<br>Sigmoid                                    |

## B. Model Architecture

Our model architecture is directly taken from Flow++ (Ho et al., 2019), with some minor changes to make best use of the increased dimensionality.

Flow++ has three types of invertible transformation steps, activation normalization **ActNorm** (Kingma & Dhariwal, 2018), invertible  $1 \times 1$  convolution **Pointwise** (Kingma & Dhariwal, 2018) and mixture-of-logistic attention coupling layer **MixLogisticAttnCoupling** (Ho et al., 2019). Each coupling layers is controlled by the number of convolution-attention hidden layers  $B$ , number of filters  $D_H$ , and number of logistic mixture components  $K$ , as mentioned in Sec. 6. There are two types of input splits for coupling layer, where **ChannelSplit** partitions input by channel, and **CheckerboardSplit** partitions input by space. Squeezing operation **SpaceToDepth** (Dinh et al., 2017) is adopted for multiscale modeling. Conditional distributions, including augmented data distribution  $q(\mathbf{z}|\mathbf{x} + \mathbf{u})$  and dequantization distribution  $r(\mathbf{u}|\mathbf{x})$ , are implemented by adding a transformed version of  $\mathbf{x}$  to the input of every coupling layer. Further denoting **TupleFlip** as flipping the two split inputs, **Inverse**( $\cdot$ ) as the inverse transformation, and **MixLogisticCoupling** as MixLogisticAttnCoupling without attention, Flow++ consists the following building blocks:

$$f_{\text{checker}}(B, D_H, K) = \text{CheckerboardSplit} \rightarrow \text{ActNorm} \rightarrow \text{Pointwise} \rightarrow \text{MixLogisticAttnCoupling}(B, D_H, K) \\ \rightarrow \text{TupleFlip} \rightarrow \text{Inverse}(\text{CheckerboardSplit})$$

$$f_{\text{channel}}(B, D_H, K) = \text{ChannelSplit} \rightarrow \text{ActNorm} \rightarrow \text{Pointwise} \rightarrow \text{MixLogisticAttnCoupling}(B, D_H, K) \\ \rightarrow \text{TupleFlip} \rightarrow \text{Inverse}(\text{ChannelSplit})$$

$$g_{\text{checker}}(B, D_H, K) = \text{CheckerboardSplit} \rightarrow \text{ActNorm} \rightarrow \text{Pointwise} \rightarrow \text{MixLogisticCoupling}(B, D_H, K) \\ \rightarrow \text{TupleFlip} \rightarrow \text{Inverse}(\text{CheckerboardSplit})$$

$$g_{\text{channel}}(B, D_H, K) = \text{ChannelSplit} \rightarrow \text{ActNorm} \rightarrow \text{Pointwise} \rightarrow \text{MixLogisticCoupling}(B, D_H, K) \\ \rightarrow \text{TupleFlip} \rightarrow \text{Inverse}(\text{ChannelSplit})$$

We show the model architectures used in Sec. 6.1 and Sec. 6.3 in Table 4, where the architecture of VFlow is almost identical with the baseline Flow++, except we use both  $f_{\text{checker}}$  and  $f_{\text{channel}}$  for the  $32 \times 32$  scale, while Flow++ uses only  $f_{\text{checker}}$ . Flow++ cannot use  $f_{\text{channel}}$  for the  $32 \times 32$  scale because there are odd number (3) of channels. The model architectures under 4-million-parameter budget used in Sec. 6.2 are listed in Table 5. In this experiment, we use a special affine coupling

Table 5. Model architecture for ablation experiment under fixed parameter budget.

| Model                                                                                                    | 3-channel Flow++                                                                     | 4-channel VFlow                                                                                                             | 6-channel VFlow                                                                                                             |
|----------------------------------------------------------------------------------------------------------|--------------------------------------------------------------------------------------|-----------------------------------------------------------------------------------------------------------------------------|-----------------------------------------------------------------------------------------------------------------------------|
| Parameters                                                                                               | 4.02M                                                                                | 4.03M                                                                                                                       | 4.01M                                                                                                                       |
| bpd                                                                                                      | 3.21                                                                                 | 3.15                                                                                                                        | 3.12                                                                                                                        |
| Architecture for $p(\mathbf{x}, \mathbf{z})$ : direction $(\mathbf{x}, \mathbf{z}) \rightarrow \epsilon$ |                                                                                      |                                                                                                                             |                                                                                                                             |
| $32 \times 32$                                                                                           | $f_{\text{checker}}(13, 32, 4) \times 4$                                             | $f_{\text{affine}}(3, 32) \times 1$<br>$f_{\text{checker}}(11, 32, 4) \times 2$<br>$f_{\text{channel}}(11, 32, 4) \times 2$ | $f_{\text{affine}}(3, 32) \times 1$<br>$f_{\text{checker}}(10, 32, 4) \times 2$<br>$f_{\text{channel}}(10, 32, 4) \times 2$ |
|                                                                                                          | SpaceToDepth                                                                         | SpaceToDepth                                                                                                                | SpaceToDepth                                                                                                                |
| $16 \times 16$                                                                                           | $f_{\text{channel}}(13, 32, 4) \times 2$<br>$f_{\text{checker}}(13, 32, 4) \times 3$ | $f_{\text{checker}}(11, 32, 4) \times 2$<br>$f_{\text{channel}}(11, 32, 4) \times 3$                                        | $f_{\text{checker}}(10, 32, 4) \times 2$<br>$f_{\text{channel}}(10, 32, 4) \times 3$                                        |
| Architecture for $q(\mathbf{z} \mathbf{x})$ : direction $\epsilon_q \rightarrow \mathbf{z}$              |                                                                                      |                                                                                                                             |                                                                                                                             |
| $32 \times 32$                                                                                           | N/A                                                                                  | $g_{\text{checker}}(3, 32, 4) \times 4$<br>Sigmoid                                                                          | $g_{\text{checker}}(3, 32, 4) \times 4$<br>Sigmoid                                                                          |
| Architecture for $r(\mathbf{u} \mathbf{x})$ : direction $\epsilon_r \rightarrow \mathbf{u}$              |                                                                                      |                                                                                                                             |                                                                                                                             |
| $32 \times 32$                                                                                           | $f_{\text{checker}}(2, 32, 4) \times 4$<br>Sigmoid                                   | $f_{\text{checker}}(2, 32, 4) \times 4$<br>Sigmoid                                                                          | $f_{\text{checker}}(2, 32, 4) \times 4$<br>Sigmoid                                                                          |

layer to mix  $\mathbf{z}$  and  $\mathbf{x}$  forcibly:

$$\mathbf{y}_1 = \mathbf{z}, \quad \mathbf{y}_2 = \boldsymbol{\mu}(\mathbf{z}) + \exp(\mathbf{s}(\mathbf{z})) \circ \mathbf{x}, \quad f_{\text{affine}} = \text{concat}(\mathbf{y}_1, \mathbf{y}_2)$$

where  $\boldsymbol{\mu}$  and  $\mathbf{s}$  are  $\mathbb{R}^{D_z} \rightarrow \mathbb{R}^{D_x}$  functions. We empirically find that adding this special affine coupling layer accelerates the convergence for small networks. The building block with this affine coupling layer with  $B$  hidden layers and  $D_H$  hidden units is denoted as  $f_{\text{affine}}(B, D_H)$  in Table 5.

### Fixing Gradient Explosion

In our experiments, we find that the implementation of mixture-of-logistic attention coupling layer (Ho et al., 2019) sometimes produces huge gradients, leading the training to diverge. To see this, note that the mixture-of-logistic attention coupling layer for a given input  $\mathbf{x} = (\mathbf{x}_1, \mathbf{x}_2)$  and the output  $\mathbf{y} = (\mathbf{y}_1, \mathbf{y}_2)$  is defined by:

$$\text{MixLogCDF}(x; \boldsymbol{\pi}, \boldsymbol{\mu}, \mathbf{s}) = \sum_{i=1}^K \pi_i \sigma((x - \mu_i) \cdot \exp(-s_i)), \quad \text{where} \quad \sum_{i=1}^K \pi_i = 1$$

$$\mathbf{y}_1 = \mathbf{x}_1, \quad \mathbf{y}_2 = \sigma^{-1}(\text{MixLogCDF}(\mathbf{x}_2; \boldsymbol{\pi}_\theta(\mathbf{x}_1), \boldsymbol{\mu}_\theta(\mathbf{x}_1), \mathbf{s}_\theta(\mathbf{x}_1))) \circ \exp(\mathbf{a}_\theta(\mathbf{x}_1)) + \mathbf{b}_\theta(\mathbf{x}_1),$$

where  $\sigma(x) = \frac{1}{1+e^{-x}}$  is the sigmoid function. However, the inverse sigmoid may cause gradient explosion. For example, if  $x = 1 - 10^{-N}$ , then  $(\sigma^{-1}(x))' = \frac{1}{x(1-x)} \approx 10^N$ . If for each component,  $x - \mu_i$  is large and  $s_i$  is small, then  $(x - \mu_i) \cdot \exp(-s_i)$  is large, and  $\text{MixLogCDF}(\mathbf{x}_2; \boldsymbol{\pi}_\theta(\mathbf{x}_1), \boldsymbol{\mu}_\theta(\mathbf{x}_1), \mathbf{s}_\theta(\mathbf{x}_1))$  will be close to 1, leading to gradient explosion of the inverse sigmoid function. For example, if  $\pi_i = 1$ ,  $x - \mu_i = 4$  and  $s_i = -1$ , we have  $\text{MixLogCDF} = \sigma((x - \mu_i) \cdot \exp(-s_i)) \approx 1 - 2 \cdot 10^{-5}$  and then the gradient can be very large. We fix this issue by scaling the input of the inverse sigmoid function to  $[0.05, 0.95]$ :

$$\mathbf{y}_2 = \sigma^{-1}(0.05 + 0.9 * \text{MixLogCDF}(\mathbf{x}_2; \boldsymbol{\pi}_\theta(\mathbf{x}_1), \boldsymbol{\mu}_\theta(\mathbf{x}_1), \mathbf{s}_\theta(\mathbf{x}_1))) \circ \exp(\mathbf{a}_\theta(\mathbf{x}_1)) + \mathbf{b}_\theta(\mathbf{x}_1).$$

## C. Extra Experiments

We further study whether it is better to put more parameters on  $p(\mathbf{x}, \mathbf{z})$  or  $q(\mathbf{z}|\mathbf{x})$ . Under a fixed 4 million total parameter budget, we vary the parameter allocation between  $p(\mathbf{x}, \mathbf{z})$  or  $q(\mathbf{z}|\mathbf{x})$ , and list the corresponding result and model architecture in Table 6. The result implies that it is better to put most parameters on  $p(\mathbf{x}, \mathbf{z})$ , supporting our claim in Sec. 4 that the variational distribution of VFlow is not necessarily as complicated as those in VAEs.

Table 6. Parameter allocation between  $p(\mathbf{x}, \mathbf{z})$  and  $q(\mathbf{z}|\mathbf{x})$ .

|                                                                                                          | 6-channel VFlow                         | 6-channel VFlow                         | 6-channel VFlow                          |
|----------------------------------------------------------------------------------------------------------|-----------------------------------------|-----------------------------------------|------------------------------------------|
| Total parameters                                                                                         | 4.00M                                   | 4.05M                                   | 4.01M                                    |
| $q(\mathbf{z} \mathbf{x})$ parameters                                                                    | 0.83M                                   | 0.64M                                   | 0.36M                                    |
| bpd                                                                                                      | 3.14                                    | 3.13                                    | 3.12                                     |
| Architecture for $p(\mathbf{x}, \mathbf{z})$ : direction $(\mathbf{x}, \mathbf{z}) \rightarrow \epsilon$ |                                         |                                         |                                          |
| $32 \times 32$                                                                                           | $f_{\text{affine}}(3, 32) \times 1$     | $f_{\text{affine}}(3, 32) \times 1$     | $f_{\text{affine}}(3, 32) \times 1$      |
|                                                                                                          | $f_{\text{checker}}(8, 32, 4) \times 2$ | $f_{\text{checker}}(9, 32, 4) \times 2$ | $f_{\text{checker}}(10, 32, 4) \times 2$ |
|                                                                                                          | $f_{\text{channel}}(8, 32, 4) \times 2$ | $f_{\text{channel}}(9, 32, 4) \times 2$ | $f_{\text{channel}}(10, 32, 4) \times 2$ |
|                                                                                                          | SpaceToDepth                            | SpaceToDepth                            | SpaceToDepth                             |
| $16 \times 16$                                                                                           | $f_{\text{checker}}(8, 32, 4) \times 2$ | $f_{\text{checker}}(9, 32, 4) \times 2$ | $f_{\text{checker}}(10, 32, 4) \times 2$ |
|                                                                                                          | $f_{\text{channel}}(8, 32, 4) \times 3$ | $f_{\text{channel}}(9, 32, 4) \times 3$ | $f_{\text{channel}}(10, 32, 4) \times 3$ |
| Architecture for $q(\mathbf{z} \mathbf{x})$ : direction $\epsilon_q \rightarrow \mathbf{z}$              |                                         |                                         |                                          |
| $32 \times 32$                                                                                           | $g_{\text{checker}}(8, 32, 4) \times 4$ | $g_{\text{checker}}(6, 32, 4) \times 4$ | $g_{\text{checker}}(3, 32, 4) \times 4$  |
|                                                                                                          | Sigmoid                                 | Sigmoid                                 | Sigmoid                                  |
| Architecture for $r(\mathbf{u} \mathbf{x})$ : direction $\epsilon_r \rightarrow \mathbf{u}$              |                                         |                                         |                                          |
| $32 \times 32$                                                                                           | $f_{\text{checker}}(2, 32, 4) \times 4$ | $f_{\text{checker}}(2, 32, 4) \times 4$ | $f_{\text{checker}}(2, 32, 4) \times 4$  |
|                                                                                                          | Sigmoid                                 | Sigmoid                                 | Sigmoid                                  |

## References

- Behrmann, J., Grathwohl, W., Chen, R. T., Duvenaud, D., and Jacobsen, J.-H. Invertible residual networks. In *International Conference on Machine Learning*, pp. 573–582, 2019.
- Chen, T. Q., Rubanova, Y., Bettencourt, J., and Duvenaud, D. K. Neural ordinary differential equations. In *Advances in Neural Information Processing Systems*, pp. 6571–6583, 2018.
- Chen, T. Q., Behrmann, J., Duvenaud, D. K., and Jacobsen, J.-H. Residual flows for invertible generative modeling. In *Advances in Neural Information Processing Systems*, pp. 9913–9923, 2019.
- Chen, X., Kingma, D. P., Salimans, T., Duan, Y., Dhariwal, P., Schulman, J., Sutskever, I., and Abbeel, P. Variational lossy autoencoder. In *International Conference on Learning Representations*, 2017.
- Choi, H., Jang, E., and Alemi, A. A. Waic, but why? generative ensembles for robust anomaly detection. *arXiv preprint arXiv:1810.01392*, 2018.
- Dinh, L., Krueger, D., and Bengio, Y. Nice: Non-linear independent components estimation. In *International Conference on Learning Representations Workshop*, 2014.
- Dinh, L., Sohl-Dickstein, J., and Bengio, S. Density estimation using real nvp. In *International Conference on Learning Representations*, 2017.
- Dupont, E., Doucet, A., and Teh, Y. W. Augmented neural odes. In *Advances in Neural Information Processing Systems*, pp. 3134–3144, 2019.
- Durkan, C., Bekasov, A., Murray, I., and Papamakarios, G. Neural spline flows. In *Advances in Neural Information Processing Systems*, pp. 7509–7520, 2019.
- Goodfellow, I., Pouget-Abadie, J., Mirza, M., Xu, B., Warde-Farley, D., Ozair, S., Courville, A., and Bengio, Y. Generative adversarial nets. In *Advances in Neural Information Processing Systems*, pp. 2672–2680, 2014.
- Grathwohl, W., Chen, R. T., Bettencourt, J., Sutskever, I., and Duvenaud, D. Ffjord: Free-form continuous dynamics for scalable reversible generative models. In *International Conference on Learning Representations*, 2019.

- Gulrajani, I., Kumar, K., Ahmed, F., Taiga, A. A., Visin, F., Vazquez, D., and Courville, A. Pixelvae: A latent variable model for natural images. In *International Conference on Learning Representations*, 2017.
- Gybenko, G. Approximation by superposition of sigmoidal functions. *Mathematics of Control, Signals and Systems*, 2(4): 303–314, 1989.
- He, K., Zhang, X., Ren, S., and Sun, J. Deep residual learning for image recognition. In *Proceedings of the IEEE Conference on Computer Vision and Pattern Recognition*, pp. 770–778, 2016.
- Ho, J., Chen, X., Srinivas, A., Duan, Y., and Abbeel, P. Flow++: Improving flow-based generative models with variational dequantization and architecture design. In *International Conference on Machine Learning*, pp. 2722–2730, 2019.
- Hoogeboom, E., Van Den Berg, R., and Welling, M. Emerging convolutions for generative normalizing flows. In *International Conference on Machine Learning*, pp. 2771–2780, 2019.
- Huang, C.-W., Dinh, L., and Courville, A. Augmented normalizing flows: Bridging the gap between generative flows and latent variable models. *arXiv:2002.07101*, 2020.
- Jacobsen, J.-H., Smeulders, A., and Oyallon, E. i-revnet: Deep invertible networks. In *International Conference on Learning Representations*, 2018.
- Kingma, D. P. and Ba, J. Adam: A method for stochastic optimization. In *International Conference on Learning Representations*, 2015.
- Kingma, D. P. and Dhariwal, P. Glow: Generative flow with invertible 1x1 convolutions. In *Advances in Neural Information Processing Systems*, pp. 10215–10224, 2018.
- Kingma, D. P. and Welling, M. Auto-encoding variational bayes. In *International Conference on Learning Representations*, 2014.
- Kingma, D. P., Salimans, T., Jozefowicz, R., Chen, X., Sutskever, I., and Welling, M. Improved variational inference with inverse autoregressive flow. In *Advances in Neural Information Processing Systems*, pp. 4743–4751, 2016.
- Mhaskar, H. N. Approximation properties of a multilayered feedforward artificial neural network. *Advances in Computational Mathematics*, 1(1):61–80, 1993.
- Morrow, R. and Chiu, W.-C. Variational autoencoders with normalizing flow decoders, 2020. URL <https://openreview.net/forum?id=r1eh30NFwB>.
- Müller, T., McWilliams, B., Rousselle, F., Gross, M., and Novák, J. Neural importance sampling. *ACM Transactions on Graphics (TOG)*, 38(5):145, 2019.
- Nalisnick, E., Matsukawa, A., Teh, Y. W., Gorur, D., and Lakshminarayanan, B. Hybrid models with deep and invertible features. In *International Conference on Machine Learning*, pp. 4723–4732, 2019.
- Papamakarios, G., Pavlakou, T., and Murray, I. Masked autoregressive flow for density estimation. In *Advances in Neural Information Processing Systems*, pp. 2338–2347, 2017.
- Prenger, R., Valle, R., and Catanzaro, B. Waveglow: A flow-based generative network for speech synthesis. In *IEEE International Conference on Acoustics, Speech and Signal Processing (ICASSP)*, pp. 3617–3621. IEEE, 2019.
- Rezende, D. and Mohamed, S. Variational inference with normalizing flows. In *International Conference on Machine Learning*, pp. 1530–1538, 2015.
- Song, Y., Meng, C., and Ermon, S. Mintnet: Building invertible neural networks with masked convolutions. In *Advances in Neural Information Processing Systems*, pp. 11002–11012, 2019.
- Tan, M. and Le, Q. Efficientnet: Rethinking model scaling for convolutional neural networks. In *International Conference on Machine Learning*, pp. 6105–6114, 2019.
- Van Oord, A., Kalchbrenner, N., and Kavukcuoglu, K. Pixel recurrent neural networks. In *International Conference on Machine Learning*, pp. 1747–1756, 2016.

Yang, G., Huang, X., Hao, Z., Liu, M.-Y., Belongie, S., and Hariharan, B. Pointflow: 3d point cloud generation with continuous normalizing flows. In *Proceedings of the IEEE International Conference on Computer Vision*, pp. 4541–4550, 2019.

Zagoruyko, S. and Komodakis, N. Wide residual networks. *arXiv preprint arXiv:1605.07146*, 2016.
